# Supplementary material
Source: PubMed Central journal article supplement (PMC4880483)
Supplement: NIHMS786829-supplement-supplement_1.pdf [file NIHMS786829-supplement-supplement_1.pdf]

**Supplementary Table 1. Metabolites measured in CRIC case-control analysis**

| <b>Metabolite</b>           | <b>OR per SD</b> | <b>p-value</b> |
|-----------------------------|------------------|----------------|
| uric acid                   | 9.72             | 2.9E-03        |
| glucuronate                 | 1.84             | 6.5E-03        |
| threonine                   | 0.35             | 1.0E-02        |
| 4-hydroxymandelate          | 5.00             | 1.1E-02        |
| 3-methyladipate/pimelate    | 1.95             | 1.3E-02        |
| methionine                  | 0.35             | 3.5E-02        |
| cytosine                    | 1.61             | 3.7E-02        |
| phenylalanine               | 0.23             | 4.3E-02        |
| homogentisate               | 3.32             | 4.4E-02        |
| arginine                    | 0.46             | 4.5E-02        |
| cotinine                    | 1.11             | 5.2E-02        |
| inositol                    | 2.11             | 5.3E-02        |
| cAMP                        | 1.53             | 5.6E-02        |
| taurine                     | 1.94             | 5.7E-02        |
| 3-hydroxyanthranilic acid   | 0.60             | 5.9E-02        |
| sebacate                    | 2.71             | 6.8E-02        |
| histamine                   | 0.71             | 7.8E-02        |
| alpha-glycerophosphocholine | 1.54             | 8.0E-02        |
| lactose                     | 1.33             | 8.0E-02        |
| pentose monophosphate       | 1.54             | 9.3E-02        |
| symmetric dimethylarginine  | 1.87             | 9.4E-02        |
| betaine                     | 2.79             | 9.8E-02        |
| isocitrate                  | 1.78             | 1.1E-01        |
| creatine                    | 0.72             | 1.1E-01        |
| C4-methylmalonylcarnitine_B | 1.56             | 1.1E-01        |
| suberate                    | 1.47             | 1.2E-01        |
| 1-methylnicotinamide        | 0.79             | 1.2E-01        |
| hexose monophosphate        | 1.51             | 1.2E-01        |
| tryptophan                  | 0.50             | 1.2E-01        |
| thymine                     | 2.17             | 1.2E-01        |
| fumarate/maleate            | 1.82             | 1.3E-01        |
| lysine                      | 0.44             | 1.3E-01        |
| 2-hydroxyglutarate          | 1.48             | 1.3E-01        |
| hypoxanthine                | 1.30             | 1.4E-01        |
| C3 malonylcarnitine         | 1.34             | 1.4E-01        |
| salicylurate                | 0.92             | 1.4E-01        |
| GMP                         | 1.20             | 1.4E-01        |
| anthranilic acid            | 0.68             | 1.4E-01        |
| hexose diphosphate          | 1.51             | 1.5E-01        |
| C18:2-linoleylcarnitine     | 1.57             | 1.5E-01        |
| C5 glutarylcarnitine_A      | 1.41             | 1.5E-01        |
| xanthurenate                | 0.66             | 1.7E-01        |

|                                |      |         |
|--------------------------------|------|---------|
| acetylcholine/butyrobetaine    | 0.59 | 1.8E-01 |
| AMP                            | 1.21 | 1.9E-01 |
| 3-hydroxykynurenate            | 1.31 | 1.9E-01 |
| GDP                            | 1.17 | 2.0E-01 |
| N-carbomoyl-beta-alanine       | 1.47 | 2.1E-01 |
| uracil                         | 1.60 | 2.1E-01 |
| erythrose-4-phosphate          | 1.46 | 2.2E-01 |
| glutamate                      | 1.42 | 2.2E-01 |
| 2-aminoadipate                 | 0.74 | 2.3E-01 |
| cytidine                       | 1.28 | 2.4E-01 |
| dimethylglycine                | 1.44 | 2.4E-01 |
| C12 lauroylcarnitine           | 1.28 | 2.5E-01 |
| glycocholate                   | 1.15 | 2.6E-01 |
| C9 nonanoylcarnitine           | 1.30 | 2.7E-01 |
| pantothenate                   | 0.83 | 2.7E-01 |
| isoleucine                     | 0.58 | 2.8E-01 |
| inosine                        | 1.21 | 2.8E-01 |
| 4-pyridoxate                   | 0.91 | 2.9E-01 |
| ADP                            | 1.14 | 2.9E-01 |
| C7 heptanoylcarnitine          | 1.37 | 2.9E-01 |
| 2-phosphoglycerate             | 0.84 | 3.0E-01 |
| C14 myristoylcarnitine         | 1.33 | 3.2E-01 |
| beta-alanine                   | 0.69 | 3.3E-01 |
| phosphocreatine                | 0.75 | 3.3E-01 |
| sucrose                        | 1.15 | 3.3E-01 |
| malondialdehyde                | 1.30 | 3.3E-01 |
| leucine                        | 0.59 | 3.3E-01 |
| hydroxyphenylacetate           | 1.26 | 3.6E-01 |
| C16 palmitoylcarnitine         | 1.48 | 3.6E-01 |
| lithocholate                   | 1.21 | 3.7E-01 |
| uridine                        | 1.37 | 3.7E-01 |
| aspartate                      | 1.56 | 3.8E-01 |
| thiamine                       | 0.89 | 3.9E-01 |
| C2 acetylcarnitine             | 1.53 | 3.9E-01 |
| phosphocholine                 | 0.57 | 3.9E-01 |
| xanthine                       | 1.13 | 3.9E-01 |
| C18:1 oleoylcarnitine          | 1.33 | 3.9E-01 |
| 5'-adenosylhomocysteine        | 1.34 | 4.0E-01 |
| chenodeoxycholate/deoxycholate | 0.90 | 4.1E-01 |
| anserine                       | 0.91 | 4.2E-01 |
| cystathionine                  | 1.18 | 4.2E-01 |
| valine                         | 0.63 | 4.4E-01 |
| C26 hexacosanoylcarnitine      | 1.17 | 4.5E-01 |
| niacinamide                    | 0.87 | 4.6E-01 |
| C4 butyrylcarnitines           | 0.83 | 4.7E-01 |

|                                          |      |         |
|------------------------------------------|------|---------|
| lactate                                  | 1.23 | 4.7E-01 |
| gentisate                                | 0.91 | 4.7E-01 |
| 1-methylhistamine                        | 0.84 | 4.8E-01 |
| C6 hexanoylcarnitine                     | 1.18 | 4.9E-01 |
| C5 glutarylcarnitine_B                   | 0.81 | 4.9E-01 |
| hippurate                                | 1.09 | 4.9E-01 |
| UDP                                      | 1.10 | 5.0E-01 |
| thyroxine                                | 0.80 | 5.0E-01 |
| tyrosine                                 | 0.73 | 5.0E-01 |
| glycerol                                 | 1.16 | 5.0E-01 |
| alpha-hydroxybutyrate                    | 0.84 | 5.1E-01 |
| aconitate                                | 1.26 | 5.3E-01 |
| histidine                                | 0.77 | 5.4E-01 |
| cystamine                                | 0.90 | 5.5E-01 |
| ornithine                                | 0.81 | 5.5E-01 |
| 5-hydroxyindoleacetic acid               | 0.86 | 5.6E-01 |
| malate                                   | 1.19 | 5.6E-01 |
| glycodeoxycholate/glycochenodeoxycholate | 1.07 | 5.6E-01 |
| indoxyl sulfate                          | 0.91 | 5.6E-01 |
| C5 valerylcarnitine                      | 0.84 | 5.7E-01 |
| guanosine                                | 0.84 | 5.8E-01 |
| cholate                                  | 0.96 | 5.9E-01 |
| taurocholate                             | 1.05 | 6.0E-01 |
| indole-3-propionate                      | 0.94 | 6.0E-01 |
| beta-hydroxybutyrate                     | 1.06 | 6.0E-01 |
| 5-hydroxytryptophan                      | 0.95 | 6.0E-01 |
| pyruvate                                 | 0.90 | 6.1E-01 |
| kynurenic acid                           | 0.90 | 6.3E-01 |
| glutamine                                | 0.73 | 6.6E-01 |
| taurodeoxycholate/taurochenodeoxycholate | 1.04 | 6.9E-01 |
| glycine                                  | 1.16 | 7.0E-01 |
| sarcosine                                | 0.86 | 7.1E-01 |
| citicholine                              | 1.05 | 7.1E-01 |
| xanthosine                               | 1.08 | 7.2E-01 |
| methionine sulfoxide                     | 0.90 | 7.2E-01 |
| citrate                                  | 0.87 | 7.2E-01 |
| phosphoethanolamine                      | 0.96 | 7.3E-01 |
| adipate                                  | 0.90 | 7.4E-01 |
| pipecolic acid                           | 0.95 | 7.4E-01 |
| serotonin                                | 0.97 | 7.4E-01 |
| cysteamine                               | 0.94 | 7.5E-01 |
| serine                                   | 1.17 | 7.5E-01 |
| carnitine                                | 0.82 | 7.5E-01 |
| IMP                                      | 1.03 | 7.9E-01 |
| C3 propionylcarnitine                    | 0.92 | 8.0E-01 |

|                             |      |         |
|-----------------------------|------|---------|
| sorbitol                    | 1.04 | 8.1E-01 |
| C10 decanoylcarnitine       | 1.05 | 8.1E-01 |
| quinolinate                 | 0.94 | 8.5E-01 |
| C8 octanoylcarnitine        | 1.03 | 8.6E-01 |
| C18:0 stearoylcarnitine     | 0.94 | 8.6E-01 |
| kynurenine                  | 0.93 | 8.6E-01 |
| allantoin                   | 1.04 | 8.6E-01 |
| glucose                     | 1.06 | 8.7E-01 |
| C4 methylmalonylcarnitine_A | 1.07 | 8.7E-01 |
| alanine                     | 1.08 | 8.7E-01 |
| cis/trans hydroxyproline    | 0.96 | 8.8E-01 |
| citrulline                  | 1.06 | 8.8E-01 |
| asparagine                  | 1.07 | 8.9E-01 |
| methylmalonate              | 1.05 | 8.9E-01 |
| oxalate                     | 0.97 | 9.0E-01 |
| alpha-glycerophosphate      | 0.98 | 9.0E-01 |
| UDP-galactose/UDP-glucose   | 0.99 | 9.1E-01 |
| succinate                   | 1.04 | 9.1E-01 |
| propionate                  | 0.98 | 9.1E-01 |
| adenosine                   | 1.02 | 9.2E-01 |
| 5-aminolevulinic acid       | 0.98 | 9.3E-01 |
| aminoisobutyric acid        | 0.99 | 9.3E-01 |
| fructose/glucose/galactose  | 1.07 | 9.3E-01 |
| creatinine                  | 0.94 | 9.4E-01 |
| asymmetric dimethylarginine | 0.97 | 9.4E-01 |
| proline                     | 1.03 | 9.6E-01 |
| trimethylamine-N-oxide      | 1.01 | 9.6E-01 |
| choline                     | 1.00 | 1.0E+00 |

**Supplementary Table 2. Clinical characteristics of individuals undergoing renal arteriovenous plasma sampling**

| <b>Characteristic</b>             | <b>Total n=23</b>                                                                                              |
|-----------------------------------|----------------------------------------------------------------------------------------------------------------|
| Age (years)                       | 69.5 ± 12.7                                                                                                    |
| Sex                               | 16 male/7 female                                                                                               |
| Race/ethnicity                    | 22 Caucasian/1 Hispanic                                                                                        |
| Hypertension (%)                  | 87                                                                                                             |
| Diabetes (%)                      | 30                                                                                                             |
| Coronary artery disease (%)       | 65                                                                                                             |
| Indication for procedure          | valve disease (n=9)<br>preoperative (n=6)<br>dyspnea (n=5)<br>heart transplant monitoring (n=2)<br>other (n=1) |
| Serum creatinine (mg/dL)          | 1.06 ± 0.30                                                                                                    |
| eGFR (mL/min/1.73m <sup>2</sup> ) | 68.1 ± 19.2                                                                                                    |

The two individuals with ESRD who were enrolled in the protocol are not shown

**Supplementary Table 3. Mean metabolite V/A ratios in arteriovenous sampling**

| Metabolite                  | Mean V/A | p-value |
|-----------------------------|----------|---------|
| creatinine                  | 0.81     | 2.4E-14 |
| choline                     | 0.46     | 3.8E-12 |
| C5 carnitine                | 0.72     | 5.3E-12 |
| suberate                    | 0.74     | 2.8E-11 |
| C9 carnitine                | 0.33     | 4.1E-11 |
| malate                      | 0.39     | 7.8E-11 |
| aconitate                   | 0.72     | 8.4E-11 |
| putrescine                  | 0.31     | 9.5E-11 |
| fumarate/maleate            | 0.49     | 1.0E-10 |
| C10:2 carnitine             | 0.43     | 2.6E-10 |
| homovanillate               | 0.60     | 5.3E-10 |
| hypoxanthine                | 0.88     | 7.3E-10 |
| succinate                   | 0.49     | 1.2E-09 |
| 2-hydroxyglutarate          | 0.48     | 1.6E-09 |
| arginine                    | 1.16     | 2.2E-09 |
| C7 carnitine                | 0.34     | 2.6E-09 |
| 3-methyladipate/pimelate    | 0.60     | 2.8E-09 |
| C6 carnitine                | 0.57     | 3.0E-09 |
| serine                      | 1.54     | 3.2E-09 |
| dimethylglycine             | 0.85     | 7.3E-09 |
| C12:1 carnitine             | 0.59     | 7.5E-09 |
| citrulline                  | 0.62     | 8.8E-09 |
| C12 carnitine               | 0.70     | 9.9E-09 |
| N-carbamoyl-beta-alanine    | 0.82     | 4.6E-08 |
| glucuronate                 | 0.85     | 5.9E-08 |
| C5:1 carnitine              | 0.81     | 6.1E-08 |
| inositol                    | 0.84     | 6.9E-08 |
| C2 carnitine                | 0.87     | 7.5E-08 |
| 1-methylnicotinamide        | 0.35     | 9.0E-08 |
| quinolinate                 | 0.83     | 2.2E-07 |
| alanine                     | 1.15     | 5.3E-07 |
| pentose monophosphate       | 0.67     | 5.3E-07 |
| aminoisobutyric acid        | 0.54     | 5.4E-07 |
| asymmetric dimethylarginine | 0.85     | 5.5E-07 |
| C14:1 carnitine             | 0.80     | 5.6E-07 |
| C4 carnitine                | 0.79     | 5.9E-07 |
| 4-pyridoxate                | 0.47     | 6.4E-07 |
| cytosine                    | 0.80     | 7.1E-07 |
| methylmalonate              | 0.85     | 7.1E-07 |
| homogentisate               | 0.37     | 8.1E-07 |
| 4-hydroxymandelate          | 0.37     | 8.8E-07 |

|                             |      |         |
|-----------------------------|------|---------|
| alpha-ketoglutarate         | 0.78 | 1.2E-06 |
| C14:2 carnitine             | 0.69 | 1.3E-06 |
| C5-DC carnitine             | 0.86 | 1.5E-06 |
| 2-aminoadipate              | 0.80 | 1.5E-06 |
| sebacate                    | 0.87 | 1.6E-06 |
| C10 carnitine               | 0.48 | 1.8E-06 |
| 1-methylhistamine           | 0.38 | 2.7E-06 |
| allantoin                   | 0.83 | 3.4E-06 |
| C4-OH carnitine             | 0.84 | 3.5E-06 |
| kynurenic acid              | 0.54 | 4.0E-06 |
| tyrosine                    | 1.13 | 5.4E-06 |
| thymine                     | 0.72 | 8.3E-06 |
| kynurenine                  | 0.51 | 8.9E-06 |
| adipate                     | 0.75 | 9.7E-06 |
| isocitrate                  | 0.77 | 1.0E-05 |
| beta-alanine                | 0.73 | 1.1E-05 |
| C14 carnitine               | 0.87 | 1.5E-05 |
| C3-DC-CH3 carnitine         | 0.83 | 1.5E-05 |
| symmetric dimethylarginine  | 0.89 | 1.9E-05 |
| methionine                  | 1.10 | 2.1E-05 |
| orotate                     | 0.61 | 2.8E-05 |
| uridine                     | 0.70 | 4.0E-05 |
| C8 carnitine                | 0.40 | 4.7E-05 |
| uracil                      | 0.75 | 6.2E-05 |
| betaine                     | 1.09 | 7.6E-05 |
| alpha-glycerophosphocholine | 1.30 | 1.0E-04 |
| gentisate                   | 0.85 | 1.1E-04 |
| indolelactate               | 0.92 | 1.9E-04 |
| trimethylamine-N-oxide      | 0.84 | 2.0E-04 |
| salicylurate                | 0.52 | 2.5E-04 |
| threonine                   | 1.07 | 4.4E-04 |
| hippurate                   | 0.34 | 4.6E-04 |
| C3-DC carnitine             | 0.70 | 5.4E-04 |
| acetylglycine               | 0.53 | 8.1E-04 |
| pantothenate                | 0.88 | 1.4E-03 |
| leucine                     | 1.05 | 2.4E-03 |
| asparagine                  | 1.08 | 2.8E-03 |
| proline                     | 0.95 | 3.5E-03 |
| tryptophan                  | 1.04 | 5.7E-03 |
| C26 carnitine               | 0.92 | 6.1E-03 |
| xanthosine                  | 0.86 | 7.0E-03 |
| adenosine                   | 0.87 | 1.3E-02 |
| niacinamide                 | 1.25 | 1.5E-02 |
| uric acid                   | 0.98 | 1.6E-02 |
| C16 carnitine               | 0.96 | 2.2E-02 |

|                                          |      |         |
|------------------------------------------|------|---------|
| sorbitol                                 | 0.79 | 2.2E-02 |
| C18:1 carnitine                          | 0.95 | 2.7E-02 |
| sucrose                                  | 0.80 | 3.2E-02 |
| lactose                                  | 0.80 | 3.2E-02 |
| glycine                                  | 0.96 | 3.5E-02 |
| cotinine                                 | 0.62 | 4.2E-02 |
| fructose/glucose/galactose               | 0.96 | 4.2E-02 |
| serotonin                                | 0.62 | 4.3E-02 |
| C20 carnitine                            | 0.85 | 4.6E-02 |
| lysine                                   | 1.05 | 4.7E-02 |
| xanthurenate                             | 0.43 | 5.7E-02 |
| GABA                                     | 1.06 | 6.2E-02 |
| C18 carnitine                            | 1.17 | 6.5E-02 |
| chenodeoxycholate/deoxycholate           | 1.12 | 6.7E-02 |
| NG-monomethyl-L-arginine                 | 0.97 | 7.8E-02 |
| AMP                                      | 3.48 | 7.9E-02 |
| indole-3-propionate                      | 0.96 | 8.9E-02 |
| sarcosine                                | 1.04 | 1.3E-01 |
| valine                                   | 1.02 | 1.4E-01 |
| glutamate                                | 0.99 | 1.5E-01 |
| hydroxyproline                           | 0.84 | 1.9E-01 |
| histamine                                | 1.68 | 1.9E-01 |
| methionine sulfoxide                     | 0.96 | 1.9E-01 |
| 2/3-phosphoglycerate                     | 1.24 | 1.9E-01 |
| creatine                                 | 1.03 | 2.0E-01 |
| carnitine                                | 1.02 | 2.1E-01 |
| xanthine                                 | 1.02 | 2.1E-01 |
| ADP                                      | 3.97 | 2.5E-01 |
| C18:2 carnitine                          | 1.00 | 2.6E-01 |
| C16-OH carnitine                         | 1.71 | 2.8E-01 |
| thiamine                                 | 0.73 | 2.9E-01 |
| hydroxyphenylacetate                     | 0.91 | 3.0E-01 |
| pipecolic acid                           | 0.99 | 3.2E-01 |
| histidine                                | 1.03 | 3.3E-01 |
| 3-hydroxyanthranilic acid                | 1.33 | 3.4E-01 |
| taurine                                  | 1.02 | 3.6E-01 |
| C18:1-OH carnitine                       | 0.94 | 3.9E-01 |
| pyroglutamic acid                        | 0.97 | 3.9E-01 |
| isoleucine                               | 1.01 | 4.4E-01 |
| glutamine                                | 0.97 | 4.7E-01 |
| taurodeoxycholate/taurochenodeoxycholate | 1.45 | 5.3E-01 |
| alpha-glycerophosphate                   | 1.07 | 5.8E-01 |
| anserine                                 | 0.91 | 5.9E-01 |
| mevalonic acid                           | 0.97 | 6.2E-01 |
| glycocholate                             | 1.05 | 7.4E-01 |



|                                          |      |         |
|------------------------------------------|------|---------|
| inosine                                  | 1.57 | 7.4E-01 |
| cAMP                                     | 1.22 | 7.4E-01 |
| C3 carnitine                             | 1.00 | 7.4E-01 |
| ornithine                                | 1.02 | 9.0E-01 |
| phenylalanine                            | 1.00 | 9.2E-01 |
| glycodeoxycholate/glycochenodeoxycholate | 1.01 | 9.6E-01 |
| thyroxine                                | 1.18 | 9.8E-01 |
